# Supplementary material
Source: HighWire-hosted journal article supplement (https://bmjopen.bmj.com/content/10/7/e035094)
Supplement: inline-supplementary-material-2 [file inline-supplementary-material-2.pdf]

**Supplement 2.** Search strategy for PubMed

| Search step | Search terms                                                                                                                                                                                                                                                                                                                                                                                                                                                                                                                                                                                                                                                                                                                                                                                                                                                     |
|-------------|------------------------------------------------------------------------------------------------------------------------------------------------------------------------------------------------------------------------------------------------------------------------------------------------------------------------------------------------------------------------------------------------------------------------------------------------------------------------------------------------------------------------------------------------------------------------------------------------------------------------------------------------------------------------------------------------------------------------------------------------------------------------------------------------------------------------------------------------------------------|
| #1          | "carotid stenosis"[MeSH Terms] AND ("carotid stenosis"[MeSH Terms] OR ("carotid"[All Fields] AND "stenosis"[All Fields]) OR "carotid stenosis"[All Fields] OR ("carotid"[All Fields] AND "artery"[All Fields] AND "stenosis"[All Fields]) OR "carotid artery stenosis"[All Fields])                                                                                                                                                                                                                                                                                                                                                                                                                                                                                                                                                                              |
| #2          | "endarterectomy, carotid"[MeSH Terms] OR (("carotid artery, common"[MeSH Terms] OR ("carotid"[All Fields] AND "artery"[All Fields] AND "common"[All Fields]) OR "common carotid artery"[All Fields] OR ("carotid"[All Fields] AND "artery"[All Fields]) OR "carotid artery"[All Fields] OR "carotid arteries"[MeSH Terms] OR ("carotid"[All Fields] AND "arteries"[All Fields]) OR "carotid arteries"[All Fields] OR ("carotid"[All Fields] AND "artery"[All Fields])) AND ("surgery"[Subheading] OR "surgery"[All Fields] OR "surgical procedures, operative"[MeSH Terms] OR ("surgical"[All Fields] AND "procedures"[All Fields] AND "operative"[All Fields]) OR "operative surgical procedures"[All Fields] OR "surgery"[All Fields] OR "general surgery"[MeSH Terms] OR ("general"[All Fields] AND "surgery"[All Fields]) OR "general surgery"[All Fields])) |
| #3          | (((((("carotid artery, common"[MeSH Terms] OR ("carotid"[All Fields] AND "artery"[All Fields] AND "common"[All Fields]) OR "common carotid artery"[All Fields] OR ("carotid"[All Fields] AND "artery"[All Fields]) OR "carotid artery"[All Fields] OR "carotid arteries"[MeSH Terms] OR ("carotid"[All Fields] AND "arteries"[All Fields]) OR "carotid arteries"[All Fields] OR ("carotid"[All Fields] AND "artery"[All Fields])) AND ("stents"[MeSH Terms] OR "stents"[All Fields] OR "stenting"[All Fields])) OR CAS[All Fields]) OR (("methods"[MeSH Terms] OR "methods"[All Fields] OR "interventional"[All Fields]) AND ("therapy"[Subheading] OR "therapy"[All Fields] OR "therapeutics"[MeSH Terms] OR "therapeutics"[All Fields]))) OR ("angioplasty"[MeSH Terms] OR                                                                                     |

|     |                                                                                                                                                                                                                                                                                                                                                                                                                                                                             |
|-----|-----------------------------------------------------------------------------------------------------------------------------------------------------------------------------------------------------------------------------------------------------------------------------------------------------------------------------------------------------------------------------------------------------------------------------------------------------------------------------|
|     | "angioplasty"[All Fields])) OR (endovascular[All Fields] AND ("therapy"[Subheading] OR "therapy"[All Fields] OR "therapeutics"[MeSH Terms] OR "therapeutics"[All Fields]))                                                                                                                                                                                                                                                                                                  |
| #4  | ((("drug therapy"[MeSH Terms] OR "aspirin"[MeSH Terms]) OR ("clopidogrel"[MeSH Terms] OR "clopidogrel"[All Fields])) OR ("drug therapy"[MeSH Terms] OR ("drug"[All Fields] AND "therapy"[All Fields]) OR "drug therapy"[All Fields] OR ("medication"[All Fields] AND "therapy"[All Fields]) OR "medication therapy"[All Fields])) OR (medical[All Fields] AND ("therapy"[Subheading] OR "therapy"[All Fields] OR "therapeutics"[MeSH Terms] OR "therapeutics"[All Fields])) |
| #5  | #1 AND #2 AND #3 AND #4                                                                                                                                                                                                                                                                                                                                                                                                                                                     |
| #6  | #1 AND (#1 OR #2)                                                                                                                                                                                                                                                                                                                                                                                                                                                           |
| #7  | #1 AND (#2 OR #3)                                                                                                                                                                                                                                                                                                                                                                                                                                                           |
| #8  | #1 AND (#1 OR #3)                                                                                                                                                                                                                                                                                                                                                                                                                                                           |
| #9  | Filters: Publication date from 2000/01/01; English                                                                                                                                                                                                                                                                                                                                                                                                                          |
| #10 | (#5 OR #6 OR #7 OR #8) AND #9                                                                                                                                                                                                                                                                                                                                                                                                                                               |
