# Supplementary material
Source: HighWire-hosted journal article supplement (https://bmjopen.bmj.com/content/10/7/e035094)
Supplement: inline-supplementary-material-3 [file inline-supplementary-material-3.pdf]

**Supplement 3. Screening pilot-test form****Stage 1 screening**

1. Does the study include patients with asymptomatic carotid artery stenosis?  
YES\_\_\_\_ NO\_\_\_\_ UNCLEAR\_\_\_\_
2. Were the patients treated with medical treatment alone, carotid artery stenting, or carotid endarterectomy?  
YES\_\_\_\_ NO\_\_\_\_ UNCLEAR\_\_\_\_
3. Were the patients treated with one of the above treatments compared to each other?  
YES\_\_\_\_ NO\_\_\_\_ UNCLEAR\_\_\_\_
4. Is this a relevant study design (randomized controlled trial)?  
YES\_\_\_\_ NO\_\_\_\_ UNCLEAR\_\_\_\_

If you answer NO to any of these questions, the citation will be excluded. All other citations will be included in L2 screening.

**Stage 2 screening**

1. Does the study include patients with significant asymptomatic carotid artery stenosis ( $\geq 50\%$ )?  
YES\_\_\_\_ NO\_\_\_\_ UNCLEAR\_\_\_\_
2. Were the patients treated with medical treatment alone (containing lipid-lowering drugs), carotid artery stenting, or carotid endarterectomy?  
YES\_\_\_\_ NO\_\_\_\_ UNCLEAR\_\_\_\_
3. Were the patients treated with one of the above treatments compared to each other?  
YES\_\_\_\_ NO\_\_\_\_ UNCLEAR\_\_\_\_

4. Does the study report at least one of our safety outcomes of interest (e.g., short-term death, stroke or myocardial infarction during periprocedural period or within 30 days after any treatment), long-term death, stroke or myocardial infarction rate (mean follow-up  $\geq 6$  month), TIA rate (short- or long-term), and other major complications)?

YES\_\_\_\_ NO\_\_\_\_ UNCLEAR\_\_\_\_

5. Is this a relevant study design (randomized controlled trial)?

YES\_\_\_\_ NO\_\_\_\_ UNCLEAR\_\_\_\_

If you answer NO to any of these questions, the citation/study will be excluded. All other full-text articles will be included.
